# Supplementary material for: Oblique reactivation of lithosphere-scale lineaments controlsrift physiography – The upper crustal expression of theSorgenfrei-Tornquist Zone, offshore southern Norway
Source: Copernicus journal article supplement (doi:10.5194/se-2017-97), 2017-09-07
Supplement: Supplementary file 1 [file se-2017-97-supplement.pdf]

## Supplementary Figures

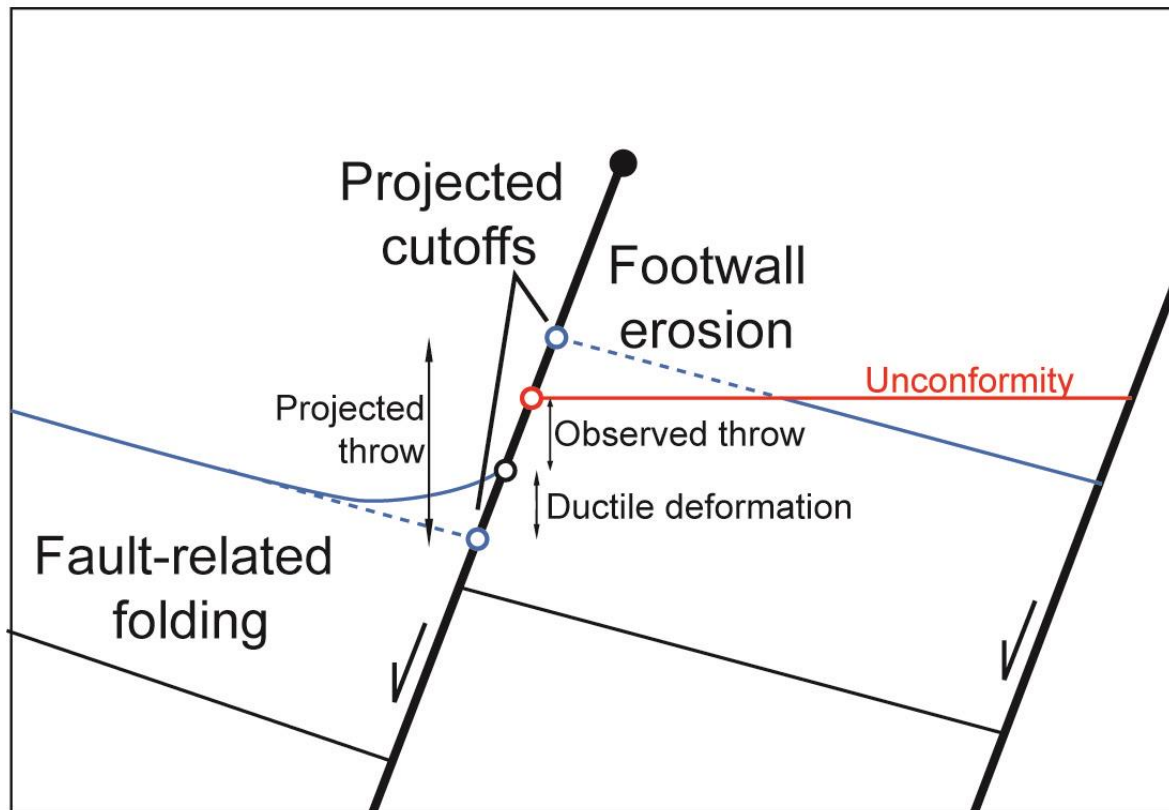

**Figure S1** – Schematic diagram showing the details of fault projections when undertaking quantitative fault analyses

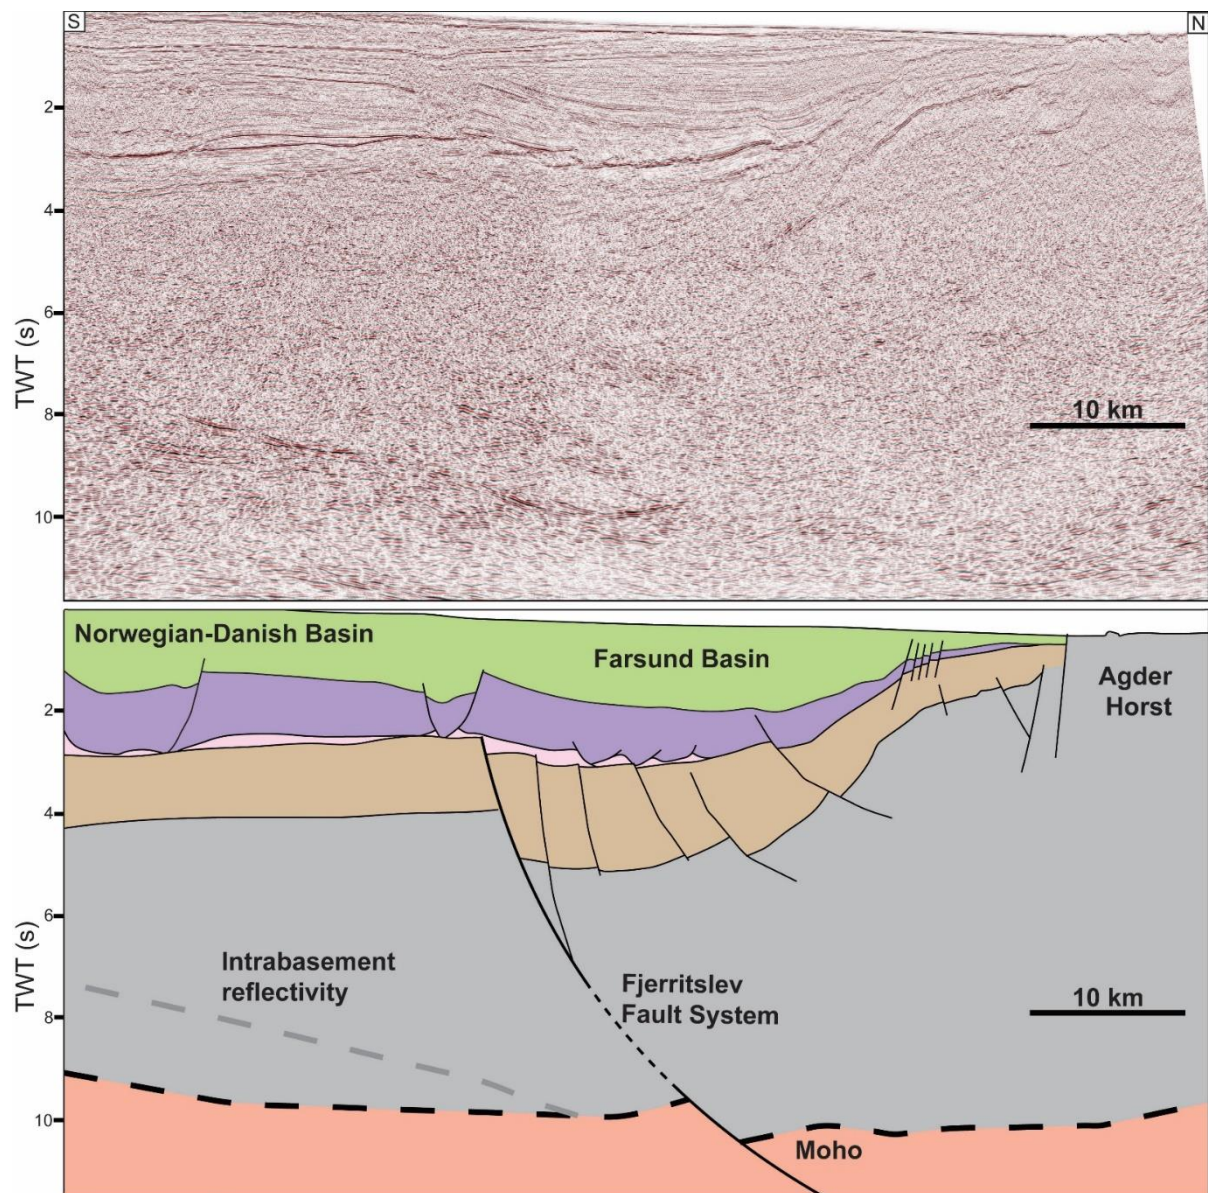

**Figure S2** – Additional seismic section showing potential offset of the Moho by the Fjerritslev Fault System



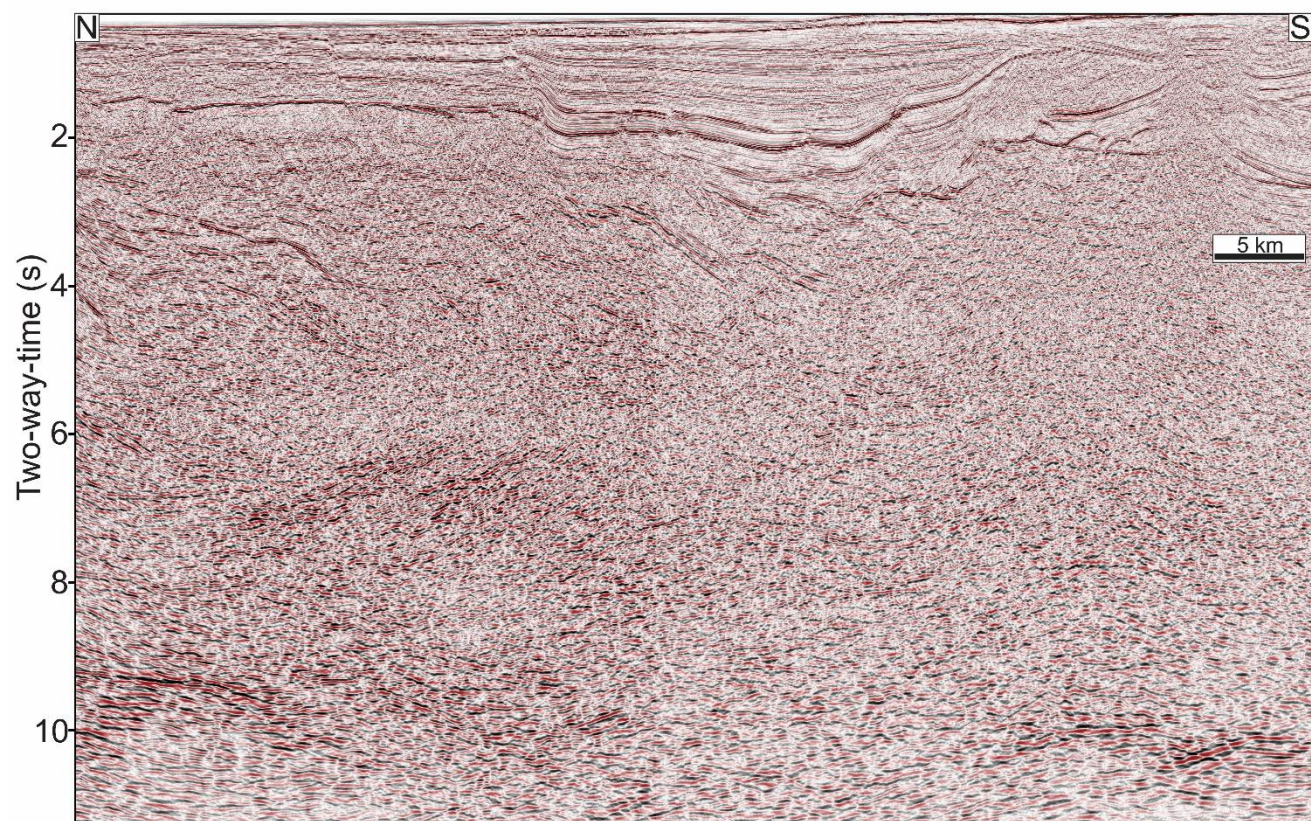

**Figure S3** – Uninterpreted seismic section of Fig. 2.
